# Supplementary material
Source: publisher figshare collection journal article supplement (https://frontiersin.figshare.com/ndownloader/files/14982800)
Supplement: Supplementary file [file 14982800]

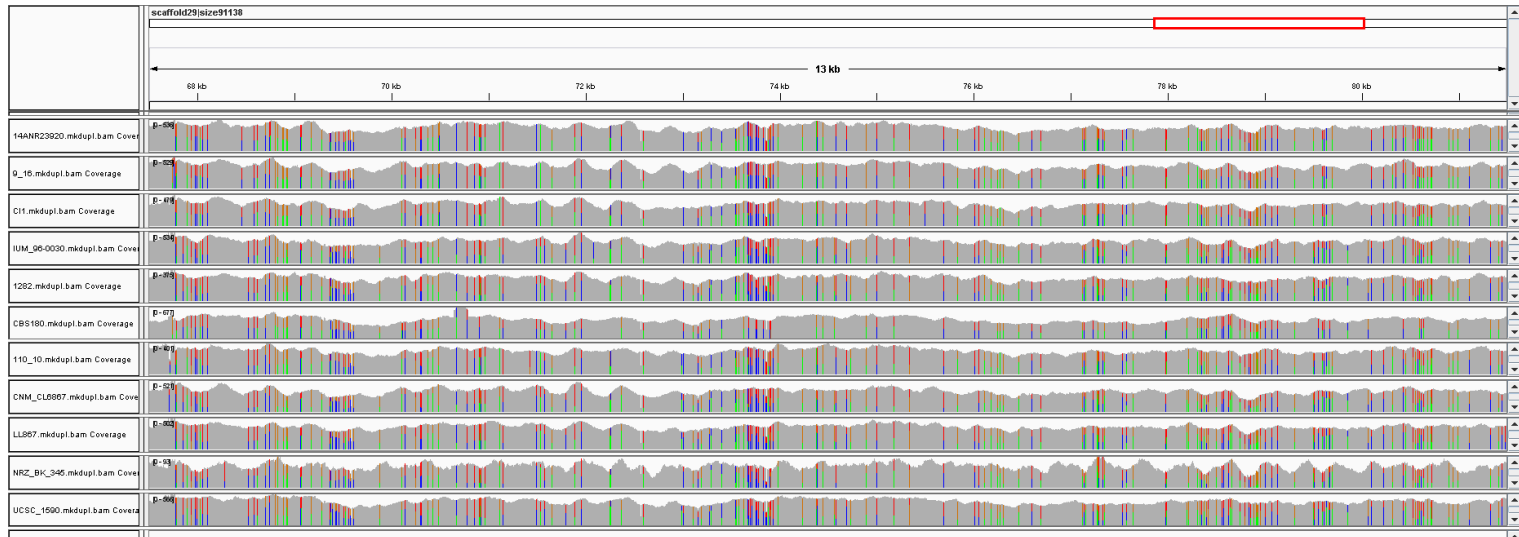

**Supplementary Fig5.** IGV image of a 13kb region of *C. inconspicua* scaffold 29 for the eleven strains studied in this project. Each row represents the genome coverage. Colors indicate polymorphic positions. In this region, strains from the two clades present similar patterns of LOH and heterozygosity.
